# Supplementary material for: Immune Response after COVID-19 mRNA Vaccination in Multiple Sclerosis Patients Treated with DMTs
Source: MDPI journal article supplement (doi:10.3390/biomedicines10123034), 2022-11-24
Supplement: s1 [file s1]

## SUPPLEMENTARY MATERIAL

**Table S3. *Lymphocytes immunophenotype pre-and post-vaccination***

| Lymphocytes/ul      | Pre- vaccination                  | Post-vaccination                  | p     |
|---------------------|-----------------------------------|-----------------------------------|-------|
|                     | mean $\pm$ SD<br>(cells count/ul) | mean $\pm$ SD<br>(cells count/ul) |       |
| <b>CD19+ B cell</b> |                                   |                                   |       |
| Cladribine          | 81.616 $\pm$ 77.455               | 93.874 $\pm$ 75.597               | 1.000 |
| Ocrelizumab         | 7.401 $\pm$ 17.658                | 7.573 $\pm$ 16.432                | 1.000 |
| <b>CD3+ T cell</b>  |                                   |                                   |       |
| Cladribine          | 811.905 $\pm$ 496.021             | 768.905 $\pm$ 421.546             | 0.998 |
| Ocrelizumab         | 1.217.126 $\pm$ 527.237           | 1.305.160 $\pm$ 593.981           | 0.759 |
| <b>CD4+ T cell</b>  |                                   |                                   |       |
| Cladribine          | 475.524 $\pm$ 284.689             | 464.619 $\pm$ 320.932             | 1.000 |
| Ocrelizumab         | 837.833 $\pm$ 394.981             | 910.143 $\pm$ 451.069             | 0.436 |
| <b>CD8+ T cell</b>  |                                   |                                   |       |
| Cladribine          | 299.905 $\pm$ 241.424             | 286.333 $\pm$ 207.881             | 1.000 |
| Ocrelizumab         | 379.293 $\pm$ 225.432             | 395.017 $\pm$ 256.120             | 0.898 |

No differences were found considering lymphocytes count pre-vaccination and post-vaccination both in c-pwMS and o-pwMS (Student's t-test). However, o-pwMS shown a trend to increase of CD4+ T cells. No sufficient lymphocytes immunophenotype data were available of fingolimod-treated patients pre-vaccination.
