# Supplementary material for: Immune Response after COVID-19 mRNA Vaccination in Multiple Sclerosis Patients Treated with DMTs
Source: MDPI journal article supplement (doi:10.3390/biomedicines10123034), 2022-11-24
Supplement: s1 [file s1]

## SUPPLEMENTARY MATERIAL

**Table S2.** *Inflammatory mediators levels pre-and post-vaccination: differences between seroconverted (1) and non-seroconverted (0) ocrelizumab-treated pwMS patients.*

| Descriptive | GrB_pre<br>(pg/ml)            |        | GrB_post<br>(pg/ml)            |        |
|-------------|-------------------------------|--------|--------------------------------|--------|
|             | 0                             | 1      | 0                              | 1      |
| Mean        | 10.069                        | 11.720 | 13.813                         | 11.440 |
| SD          | 2.914                         | 4.106  | 4.645                          | 3.658  |
| Minimum     | 6.040                         | 5.800  | 6.240                          | 7.700  |
| Maximum     | 17.300                        | 15.800 | 24.900                         | 17.200 |
|             | IFN- $\gamma$ _pre<br>(pg/ml) |        | IFN- $\gamma$ _post<br>(pg/ml) |        |
|             | 0                             | 1      | 0                              | 1      |
| Mean        | 0.972                         | 0.986  | 0.723                          | 1.442  |
| SD          | 1.143                         | 0.246  | 0.533                          | 1.205  |
| Minimum     | 0.270                         | 0.650  | 0.270                          | 0.560  |
| Maximum     | 4.650                         | 1.320  | 2.260                          | 3.120  |
|             | TNF- $\alpha$ _pre<br>(pg/ml) |        | TNF- $\alpha$ _post<br>(pg/ml) |        |
|             | 0                             | 1      | 0                              | 1      |
| Mean        | 10.340                        | 12.637 | 12.702                         | 11.027 |
| SD          | 2.263                         | 4.521  | 4.829                          | 3.035  |
| Minimum     | 6.560                         | 8.250  | 6.490                          | 6.900  |
| Maximum     | 13.900                        | 20.100 | 27.000                         | 15.300 |

Among the 43 patients tested with ELLA, o-pwMS non-seroconverted (n=13) showed GrB serum levels increase after vaccination (mean  $\pm$  SD: 13.813  $\pm$  4.645 pg/ml) compared to before (10.069  $\pm$  2.914 pg/ml), while no difference was observed in seroconverted o-pwMS. No differences were found in TNF- $\alpha$  (although a mild trend to increase was evident) and IFN- $\gamma$  serum levels pre- and post-vaccination (Student's paired t-test).
