# Supplementary material for: Immune Response after COVID-19 mRNA Vaccination in Multiple Sclerosis Patients Treated with DMTs
Source: MDPI journal article supplement (doi:10.3390/biomedicines10123034), 2022-11-24
Supplement: s1 [file s1]

## SUPPLEMENTARY MATERIAL

**Table S1. Inflammatory mediators levels pre-and post-vaccination: differences in each IS-DMT group**

| Cladribine-treated pwMS       |                                | <i>p</i> |
|-------------------------------|--------------------------------|----------|
| GrB_pre-vaccination (pg/ml)   | GrB_post-vaccination (pg/ml)   |          |
| 9.876 ± 5.022                 | 9.309 ± 3.448                  | 0.642    |
| IFN-γ_pre-vaccination (pg/ml) | IFN-γ_post-vaccination (pg/ml) |          |
| 0.634 ± 0.544                 | 0.580 ± 0.447                  | 0.984    |
| TNF-α_pre-vaccination (pg/ml) | TNF-α_post-vaccination (pg/ml) |          |
| 9.133 ± 2.990                 | 9.006 ± 2.050                  | 1.000    |
| Fingolimod-treated pwMS       |                                | <i>p</i> |
| GrB_pre-vaccination (pg/ml)   | GrB_post-vaccination (pg/ml)   |          |
| 9.587 ± 6.914                 | 9.849 ± 4.728                  | 0.847    |
| IFN-γ_pre-vaccination (pg/ml) | IFN-γ_post-vaccination (pg/ml) |          |
| 0.551 ± 0.480                 | 0.778 ± 0.411                  | 0.178    |
| TNF-α_pre-vaccination (pg/ml) | TNF-α_post-vaccination (pg/ml) |          |
| 12.513 ± 4.964                | 11.051 ± 2.980                 | 0.653    |
| Ocrelizumab-treated pwMS      |                                | <i>p</i> |
| GrB_pre--vaccination (pg/ml)  | GrB_post-vaccination (pg/ml)   |          |
| 10.555 ± 3.264                | 13.115 ± 4.407                 | 0.021    |
| IFN-γ_pre-vaccination (pg/ml) | IFN-γ_post-vaccination (pg/ml) |          |
| 0.986 ± 1.008                 | 0.981 ± 0.865                  | 0.985    |
| TNF-α_pre-vaccination (pg/ml) | TNF-α_post-vaccination (pg/ml) |          |
| 10.904 ± 2.258                | 12.036 ± 4.368                 | 0.311    |

No significant differences were found in serum GrB, IFN-γ, TNF-α levels between pre-and post-vaccination in each DMTs group (repeated measures ANCOVA).
